1 **Detection of antibodies against a conserved capsid epitope as the basis of a novel**  
2 **universal serological test for foot-and-mouth disease**

3  
4 Asfor A<sup>1</sup>, Howe N<sup>1</sup>, Grazioli S<sup>2</sup>, Berryman S<sup>1</sup>, Parekh K<sup>1</sup>., Wilsden G<sup>1</sup>, Ludi A<sup>1</sup>, King DP<sup>1</sup>,  
5 Parida S<sup>1</sup>, Brocchi E<sup>2</sup>, Tuthill TJ<sup>1</sup>  
6

7  
8 <sup>1</sup>The Pirbright Institute, Ash Road, Woking, GU24 0NF, UK

9 <sup>2</sup>Istituto Zooprofilattico Sperimentale della Lombardia e dell'Emilia Romagna, Brescia, Italy  
10

11  
12 Corresponding author:

13  
14  
15 Dr. Amin Asfor: [amin.asfor@pirbright.ac.uk](mailto:amin.asfor@pirbright.ac.uk)

16 **Abstract**

17 Diagnostic tests for foot-and-mouth disease (FMD) include the detection of antibodies  
18 against either the viral non-structural proteins or the capsid. The detection of antibodies against  
19 the structural proteins (SP) of the capsid can be used to monitor seroconversion in both infected  
20 and vaccinated animals. However, SP tests need to be tailored to the individual FMD virus  
21 serotype and their sensitivity performances may be affected by antigenic variability within each  
22 serotype and mismatching between tests reagents. As a consequence, FMD Reference  
23 Laboratories need to maintain contingency to employ multiple type-specific assays for large-  
24 scale serological surveillance and post-vaccination monitoring in the event of FMD outbreaks.  
25 In this study, a highly conserved region in the N terminus of FMDV capsid protein VP2 (VP2N)  
26 was characterised using a panel of intertypic-reactive monoclonal antibodies. This revealed a  
27 universal epitope in VP2N which could be used as a peptide antigen to detect FMDV-specific  
28 antibodies against all types of the virus. A VP2-peptide ELISA (VP2-ELISA) was optimised  
29 using experimental and reference antisera from immunized, convalescent and negative animals  
30 (n=172). The VP2-ELISA is universal, simple and provided sensitive (98.6 %) and specific  
31 (93%) detection of antibodies to all FMDV strains used in this study. We anticipate that this  
32 SP test could have utility for sero-surveillance during virus incursions in FMD-free countries  
33 and as an additional screening tool to assess FMD virus circulation in endemic countries.

34

35 **Keywords:** FMDV, conserved capsid epitope, ELISA, diagnosis, serology.

36

## 37 **Introduction**

38           Foot-and-mouth disease (FMD) is an economically devastating viral disease of cloven-  
39 hooved animals with a global distribution. It limits access to markets for developing countries  
40 and outbreaks in otherwise FMD-free countries are expensive to control (as in the UK in 2001,  
41 Japan in 2010 and the Republic of Korea in 2010 and 2011) [1, 2]. FMD virus (FMDV) is a  
42 single-stranded, positive-sense, RNA virus belonging to the genus *Aphthovirus* in the family  
43 *Picornaviridae*. The virus exists as seven serotypes (O, A, C, Asia 1, South African Territories  
44 (SAT)1, SAT2 and SAT3) as well as numerous and constantly evolving strains showing a  
45 spectrum of antigenic diversity.

46           The non-enveloped picornavirus capsid has icosahedral symmetry, a diameter of  
47 approximately 30 nm and is composed of 60 copies of each of the capsid proteins VP1, VP2,  
48 VP3 and VP4. VP1, VP2 and VP3 are the major components of the capsid, while VP4 is a  
49 small (approximately (12 kDa) internal protein which lies on the inside surface of the capsid  
50 around the five-fold axes of symmetry, where it is thought to stabilise interactions between  
51 pentameric capsid subunits [3, 4]. During the replication cycle of FMDV, eight different viral  
52 non-structural proteins (NSPs; and additional precursors) are generated which are potential  
53 serological targets for diagnostic assays [5]. The presence of antibodies against NSPs can be  
54 used to differentiate infected and vaccinated animals (DIVA) because such antibodies are only  
55 produced by infection and are not elicited after administration with purified vaccines. In  
56 addition, the inter-serotypic conservation of the NSPs means this type of test is compatible with  
57 all serotypes of FMDV. Hence, NSP tests can be used as generic screening tools to support  
58 national programs to attain the OIE status of FMD-freedom with or without vaccination [6, 7,  
59 8]. However, the specificity of these tests is less than 100% [9] and testing algorithms that are  
60 designed to confirm absence of FMDV circulation in large populations usually adopt screening  
61 and confirmatory serological assays with covariant rates of false positivity [7, 8, 9]. In this

62 context, ELISAs that measure FMDV-specific antibodies directed at capsid structural proteins  
63 (SP) are widely used to augment NSP tests for sero-surveillance activities [10, 11, 12, 13]. One  
64 of the international standard tests for FMDV antibody detection is the virus neutralisation test  
65 (VNT) [14]. However, the VNT is laborious, rendering large scale serological testing difficult.  
66 In addition, the procedure requires live virus, thus confining the test to high containment  
67 laboratories in non-endemic countries. SP ELISAs with high diagnostic sensitivity are also  
68 available for certification of animals as free from FMD prior to import and export, for  
69 serological confirmation of FMDV infection, for post vaccination monitoring and for the  
70 demonstration of vaccine efficacy [14]. However, SP assays need to be tailored to individual  
71 serotypes and as a consequence FMD Reference Laboratories need to maintain parallel assay  
72 systems to accommodate the possibility of FMD outbreak due to different virus serotypes.

73 A number of monoclonal antibodies (mAbs) have previously been reported with cross-  
74 reactivity against multiple FMDV serotypes [15, 16, 17]. The recognition sites for some of  
75 these mAbs have been mapped to a highly conserved region at the N-terminus of VP2 [15, 16,  
76 17]. In this study, a highly conserved region in the N terminus of FMDV capsid protein VP2  
77 (VP2N) was characterised using a panel of cross-reactive mAbs. This revealed a universal  
78 epitope in VP2N which has been investigated as a peptide antigen to detect FMDV-specific  
79 antibodies in serum samples from animals infected or vaccinated with any of the FMDV  
80 serotypes.

81

## 82 **Material and Methods**

### 83 **Cells lines and Viruses**

84 The IBRS-2 (pig kidney) cell line and the BHK-21 (baby hamster kidney 21) cell line, used  
85 for FMD viruses propagation and immunoassays, were maintained either in Dulbecco's  
86 modified Eagle's medium or in Minimum Essential Medium, (DMEM; Thermo-Fisher  
87 Scientific, UK) supplemented with 10% heat-inactivated foetal bovine serum (FBS; Thermo-  
88 Fisher Scientific, UK) and 100 U of penicillin-streptomycin (Sigma) per ml. FMDV strains  
89 used are indicated in each relevant paragraph.

### 90 **Peptides**

91 Peptides representing the N-terminal 15 (VP2N15), 30 (VP2N30) or 45 (VP2N45) amino  
92 acids of FMDV VP2 were synthesised (Peptide Protein Research, UK) without modifications  
93 except for the addition of 6 lysines at the C-terminus of the peptides to increase the solubility.  
94 VP2N45 was used for the development of the peptide ELISA. A control peptide equivalent to  
95 a capsid sequence from the related picornavirus human rhinovirus was used [18]. Eight  
96 peptides (15mer each) overlapping by ten amino acids , covering the first 45 amino acids  
97 from the N-terminus of the FMDV capsid sequence, were used for the fine mapping of the  
98 epitope (Fig.1a).

### 99 **Serum samples**

100 Sera from infected cattle with FMDV O/UKG 34/2001 [19] was used to optimise the ELISA.  
101 Reference sera from experimentally vaccinated or infected animals were supplied by FAO  
102 World Reference Laboratory for FMD (WRLFMD, The Pirbright Institute). The parameters  
103 of selecting serum samples were as follows: Negative (n=100): samples that been collected  
104 from negative coherent country (during the UK 2007 outbreak). These samples are from non-  
105 vaccinated animals and proved to be negative using NSP-ELISA. Positive (n=72): samples

106 that are known to be infected or vaccinated with FMDV. Selection of the positive samples  
107 was based up on more than 7days post vaccination or infection to ensure a positive response.  
108 See supplementary table (1) for more details.

### 109 **Production of mAbs**

110 The following FMD viruses were used as immunogens to produce mAbs in mice and for the  
111 following selection of heterotypic cross-reactive mAbs: serotype A Malaysia 16/97, C1  
112 Brescia 1964, Asia 1 Nepal 29/97, A24 Cruzeiro and O UK 31/2001.

113 For each immunogen, BALB/c mice were primed subcutaneously with 20µg of purified FMD  
114 virus in Freund's complete adjuvant and boosted intraperitoneally with the same antigen in  
115 phosphate buffered saline (PBS) once or twice at one-month intervals. Three days after the  
116 last boost, mice were humanely sacrificed and hybridomas were generated by fusion of  
117 splenocytes with NS0 myeloma cells following standardized procedures [20]. Briefly, at least  
118 10<sup>8</sup> spleen cells were recovered from each mouse and fused with NS0 myeloma cells at a  
119 10:1 ratio using PEG 4000. Fused cells diluted in Dulbecco's modified Eagle medium,  
120 supplemented with hypoxanthine/aminopterin/thymidine and 20% fetal calf serum, were  
121 distributed over five microplates (200µl per well). Growing colonies were observed in all  
122 wells; in order to select hybridomas secreting monoclonal antibodies specific for the  
123 immunogen, the supernatants were screened by trapping ELISAs against the homologous  
124 virus strains. Selection of the inter-types cross reactive mAbs was based on results of the  
125 trapping ELISA against the homologous and heterologous virus serotypes, as previously  
126 described [21]. The selected hybridoma cells were cloned by limiting dilution in order to  
127 obtain antibodies from one single cell. The supernatant from exhausted cultures was then  
128 used as source of mAb.

129

### 130 **Immunofluorescence confocal microscopy**

131 IBRS-2 cells on 13-mm glass coverslips (VWR) were infected with FMDV type O1  
132 Kaufbeuren (MOI = 2) for 3.75 hours and then washed with PBS and fixed with 4%  
133 paraformaldehyde for 40 min at room temperature (RT). The cells were then permeabilized  
134 for 20 min with 0.1% Triton X-100 prepared in blocking buffer (Tris-buffered saline  
135 supplemented with 1 mM CaCl<sub>2</sub>, 0.5 mM MgCl<sub>2</sub>, 10% normal goat serum, and 1% fish skin  
136 gelatin). The cells were then incubated with primary antibody (mouse mAb 4A3) diluted  
137 1/1000 in blocking buffer for 1h at RT. Subsequently, the cells were washed and incubated  
138 with Alexa-Fluor-conjugated secondary antibody (goat anti-mouse IgG Alexa-568; Thermo  
139 Fisher Scientific, UK) in blocking buffer for 45 min at RT. After washing, the cells were  
140 mounted using Vectashield mounting medium with DAPI (4,6-diamidino-2-phenylindole)  
141 (Vector Labs) and the coverslips sealed with nail varnish. All data were collected sequentially  
142 using a Leica SP8 confocal laser scanning microscope.

143

### 144 **SDS-PAGE and western blot**

145 Initial tests to verify the reactivity in western blot of each mAb with the homologous partially  
146 purified strain were performed as previously described [21]. Later on, the cross-reactivity of  
147 one representative mAb (4A3) with all FMDV serotypes was confirmed as follows.

148 Virus lysates from IBRS-2 cells infected cells with different FMDV serotypes were denatured  
149 and reduced by heating at 95°C for 5min in Red Loading Buffer and DTT (NEB). The samples  
150 were resolved through 12% Tris-glycine gels and transferred to nitrocellulose membrane  
151 (0.45µM, GE Healthcare) using a Mini-Protean tetra cell (BioRad). Membranes were placed in  
152 blocking buffer (20mM Tris, 150mM NaCl pH7.6 with 0.1% v/v tween-20 (TBS-T) with 1%  
153 bovine serum albumin (BSA) w/v (Melford)) for 1h at RT followed by incubation with  
154 hybridomas supernatants (mAbs) and anti-mouse HRP-conjugated secondary antibody (Dako)

155 (1/5000 in blocking buffer) in sequence for 1h at RT. Each incubation was separated by cycles  
156 of three washings with TBS-T. West Pico chemiluminescent substrate (Thermo Fisher  
157 Scientific, UK) was added to the membrane and exposures of the membrane were collected  
158 and visualised using a G: Box Chemi XX6 (Syngene).

159 **Serological standard tests: virus neutralisation test (VNT), liquid-phase blocking**  
160 **ELISA (LPBE), solid-phase competition ELISA (SPCE) and commercial kits**  
161 **(PrioCHECK™ FMDV Type O, Type A and Type Asia 1 Antibody ELISA kits)**

162 VNT was carried out in microplates against 100 TCID<sub>50</sub> of the homologous or heterologous  
163 viruses and results were reported as the final dilution required to neutralize 50% of the  
164 inoculated cultures [14]. The LPBE and the SPCE were carried out as described by Hamblin  
165 *et al.*, (1986) [12] and by Paiba *et al.*, (2014) [13] respectively. The cut offs used in the VNT  
166 (log titre 1.65), LPBE (log titre 1.95) and SPCE (40% of inhibition) were according to the  
167 standard operating procedures for the WRLFMD (The Pirbright Institute, UK). PrioCHECK  
168 ELISAs for FMDV type O, A and Asia 1 antibody were carried out according to the kits  
169 instructions, with 50% of inhibition as cut-offs.

170 The frequency distribution of values generated by various serological assays for the negative  
171 and the positive (vaccinated and infected animals) serum samples were plotted using  
172 GraphPad Prism (V7). Statistical analysis was performed using GraphPad Prism V7 for  
173 Windows (GraphPad Software, La Jolla California USA, [www.graphpad.com](http://www.graphpad.com)).

174 **Indirect ELISAs and the development of the VP2 ELISA**

175 Plastic 96-well plates (Maxisorp –Nunc) were coated with 100µl per well of the peptides in  
176 0.05M standard carbonate/bicarbonate coating buffer (pH 9.6) at 4°C overnight. Different  
177 peptides concentrations, ranging from 125ng/ml up to 4µg/ml, were initially evaluated for  
178 test optimization. Wells were washed three times with phosphate buffered saline (PBS)



179 containing 0.1% Tween 20 (PBS-T) between all incubations. Wells were blocked with 200µl  
180 blocking buffer (1% w/v BSA in PBS-T) at 37°C for 1h, and incubated either with 100µl of  
181 mAb (hybridoma supernatants, 1/5) or bovine sera (diluted 1:50 to 1 in 400 in blocking  
182 buffer) at 37°C for 1h. Antibody binding was detected by incubation at 37°C for 1h with  
183 100µl of species specific HRP conjugated secondary antibodies (Dako), diluted in blocking  
184 buffer 1:1,000 in case of anti-mouse Ig conjugate or 1:15,000 for the anti-bovine-Ig conjugate  
185 . The chromogen development was mediated by the addition of 50µl of HRP substrate (OPD:  
186 Sigma FAST, Sigma, UK). The reaction was stopped after 20min by addition of 50µl of  
187 1.25M sulphuric acid and the optical density (OD) was measured at 490nm.

## 188 **Results**

### 189 **Characterisation of an FMDV-VP2 conserved epitope by cross reactive mAbs**

190 Among the multiplicity of mAbs generated from mice independently immunized with four  
191 different FMDV serotypes (A Malaysia 16/97, C1 Brescia 1964, Asia 1 Nepal 29/97, A24  
192 Cruzeiro, or O UK 31/2001), seven mAbs were selected because of their cross-reactivity with  
193 the seven FMDV serotypes. All mAbs were characterised as non-neutralising. Five of these  
194 mAbs strongly recognised the capsid protein VP2 by western blot and showed a weaker  
195 reaction with VP0, while two mAbs reacted with P1 (Table 1).

196 Previous studies have identified the conserved N-terminus of VP2 as a site for recognition by  
197 cross-reactive mAbs [15, 16, 17]. We therefore tested the reactivity of the seven mAbs  
198 against peptides equivalent to the first 15 (VP2N15), 30 (VP2N30) or 45 (VP2N45) amino  
199 acids of the N-terminus of VP2 from FMDV O1K (Fig.1a). The N-terminus of VP2 is known  
200 to be most highly conserved within the first 15 amino acids. The five mAbs (4D1, 1D6, 4A3,  
201 5B2 and 5F10) identified as VP2-specific by Western blots also reacted strongly with the  
202 VP2 peptides in ELISA (Fig.1b). Among them, two mAbs (4A3 and 5B2) showed an

203 equivalent reactivity with the three peptides, while the three remaining mAbs recognized the  
204 VP2N15 peptide with lower intensity (Fig.1b). The mAb 4A3 was taken forward for further  
205 characterisation. In particular, fine mapping using 15mer peptides with 10 amino acids  
206 overlaps (Fig.1a) showed that mAb 4A3 reacted with the 15mer peptide that corresponded to  
207 the N-terminus of VP2 and not with a 15mer starting at amino acid 6, confirming the  
208 presence of an epitope at the N-terminus of VP2 (Fig.1c). The mAb 4A3 specifically detected  
209 a protein band in western blot of the expected size for VP2 in cell lysates from infections  
210 with all 7 serotypes (Fig.1d) confirming that the epitope is linear, conserved and specific for  
211 VP2. MAb 4A3 also recognised virus infected cells when used as the primary antibody in  
212 indirect immunofluorescence microscopy of IBRS-2 cell cultures infected with type O  
213 FMDV (Fig.1e).

#### 214 **VP2N peptides detect antibodies in sera from animals infected with all serotypes of** 215 **FMDV**

216 An indirect ELISA using peptides VP2N15, VP2N30 or VP2N45 was used to assess the  
217 presence of antibodies against the N-terminus of VP2 in a representative serum from an animal  
218 infected with type O FMDV. All three peptides captured antibodies, with the longer peptides  
219 producing a slightly higher signal (Fig.2a). A control peptide equivalent to a capsid sequence  
220 from the related picornavirus human rhinovirus gave a low signal consistent with background.

221 The longer peptide VP2N45 was then used to test monovalent sera from different animals  
222 vaccinated against the seven serotypes of FMDV; this showed that the same peptide was able  
223 to detect antibodies against all the serotypes (Fig.2b).

#### 224 **Development of a VP2 ELISA for universal detection of FMDV antibodies**

225 A VP2 ELISA using peptide VP2N45 was developed using reference sera. The optimal  
226 concentration of peptide and dilution of sera to be used in the test was first evaluated by

227 checkerboard titrations using bovine sera known to be negative or strongly positive or weakly  
228 positive for antibody by existing tests. The best signal to noise ratio (positive: negative) was  
229 obtained using a serum dilution of 1 in 100 and peptide concentration of 2 $\mu$ g/ml (Fig S.1). At  
230 these optimised conditions, the cut off for distinguishing between positive and negative  
231 signals was set as 0.4 OD units, calculated using the average value of three independent tests  
232 using the standard negative reference serum sample used by WRLFMD for routine FMDV  
233 diagnostics.

234 Using the optimized assay conditions, a collection of previously characterized serum samples  
235 was tested in triplicate and repeated twice independently, representing naïve cattle (n=100)  
236 and cattle vaccinated (n=38) or infected (n=34) with all seven serotypes of FMDV. The  
237 majority of vaccinated and infected (positive) samples gave a relatively strong signal  
238 (average absorbance value of 1.4) and the majority of naïve (negative) samples gave a  
239 relatively low signal below 0.4 (Fig.3a).

240 Seven negative sample exceeded the cut off of 0.4 OD units (ranging between 0.4 and 1.0  
241 OD) and would be considered false positive, therefore producing a diagnostic specificity for  
242 the test of 93%. The signal for one positive sample (type A vaccinated) was below this cut off  
243 and would be considered a false negative in this test giving a sensitivity of 98.6%.

#### 244 **Comparison of the VP2 ELISA with existing tests (VNT, LPBE, SPCE and** 245 **PrioCHECK)**

246 For the positive serum samples analyzed by VP2 ELISA in Fig.3a, pre-existing WRLFMD  
247 data generated using established diagnostic tests was accessed retrospectively and used to  
248 compare the performance of the VP2 ELISA. The pre-existing data was generated with four  
249 tests: VNT to quantitate neutralising antibodies, LPBE, SPCE and PrioCHECK to quantitate

250 anti-capsid antibodies. The sensitivity of the VNT, LPBE and SPCE are dependent on close  
251 antigenic match between reagents used (virus/antigen and antibodies) and the serum sample  
252 being tested. Therefore, the data from VNT and LPBE were subdivided into groups carried  
253 out with homologous (same virus used to vaccinate or infect the animal) or heterologous  
254 (same serotype but strain different than those used to vaccinate or infect the animal) reagents.  
255 The data obtained with PrioCHECK kits was only available for samples from infections with  
256 serotypes O, A and Asia 1.

257 As mentioned above, the VP2 ELISA data (Fig.3a) contained a single false negative  
258 equivalent to a sensitivity of 98.6%. In comparison, the homologous VNT data (n=37) had no  
259 false negatives (sensitivity of 100%) while the heterologous VNT data (n=72) had a  
260 sensitivity of 73.2% (Fig.3b and Table 2). Similarly, the homologous LPBE data (n=30) had  
261 no false negatives (sensitivity of 100%) and the heterologous LPBE data (n=72) had several  
262 false negatives (sensitivity of 93.0%) (Fig.3c and Table 2). The SPCE data (n=72) had a  
263 single false negative (sensitivity of 98.6%) (Fig. 3d and Table 2) and the PrioCHECK data  
264 (n=29) had two false negatives (sensitivity of 93.1%) (Fig. 3d and Table 2).

265 The single false negative sample (A Eritrea 3/98- 41dpv) in the VP2 ELISA was also a false  
266 negative in both the heterologous VNT (log titer =1.04) and heterologous LPBE (log  
267 titre=1.6), but was positive in homologous VNT (log titer of 2.06) and weakly positive in the  
268 SPCE (52 % inhibition) and PrioCHECK (65 % inhibition).

269 Overall these results show that the VP2 ELISA detected antibody to all serotypes and the OD  
270 values may provide an estimate of the level of antibodies. The sensitivity of the new test  
271 resulted equivalent to or better than PrioCHECK kits and SPCE; sensitivity was significantly  
272 higher than LPBE and VNT when such assays are carried out with heterologous reagents.

## 273 **Discussion**

274 This study describes the development of a novel assay for the detection of antibodies against  
275 the FMDV capsid that can be used to test for seroconversion in infected or vaccinated animals.  
276 The benefits of this assay are that FMDV-specific SP antibodies from all seven serotypes can  
277 be detected without the requirement for individual specific antigen or antibody reagents that  
278 are required for existing tests such as VNT, LPBE, SPCE.

279

280 This assay targets a capsid epitope at the N-terminus of VP2 that exhibits high sequence  
281 conservation among all seven serotypes of FMDV. Cross-reactive mAbs and overlapping  
282 peptides were used to show that the minimum sequence required for this linear epitope was  
283 VP2-N 1-DKKTE-5. This is consistent with previous studies, where structures of the FMDV  
284 capsid suggested that the N-terminus of VP2 is an internal component but may be flexible  
285 allowing it to be present at the surface to contribute to antigenicity [22, 23, 24]. In addition, the  
286 production of monoclonal antibodies to VP2 N-terminus in response to immunisation with  
287 FMDV, suggested that capsid flexibility may expose some of the internal domains of the capsid  
288 proteins to the surface enabling them to become antigenic sites [15,16, 17]. It has also been  
289 reported that a purified recombinant 1AB (VP4/VP2) capsid protein was detected by antisera  
290 against all seven FMDV serotypes, indicating that the VP4/VP2 protein contained a highly  
291 conserved epitope. Peptides containing the VP2 N-terminal epitope were reactive with  
292 antibodies against all seven FMDV serotypes and one (VP2N45) was selected as the basis of a  
293 novel VP2 ELISA that was evaluated with a panel of reference sera from naïve (n=100),  
294 vaccinated (n=38) and infected (n=34) cattle, representative of all the seven FMDV serotypes.  
295 Results demonstrated that the VP2 ELISA detected antibody to all serotypes with a diagnostic  
296 specificity of 93% and sensitivity of 98.6%. The sensitivity of the new ELISA was equivalent

297 to or better than existing tests, such as PrioCHECK kits and SPCE; sensitivity was significantly  
298 higher than LPBE and VNT carried out with heterologous reagents.

299 The VP2 ELISA is suitable for detection of antibodies against the capsid of FMDV either post  
300 vaccination or post infection. The capture antigen contains a universally conserved viral  
301 epitope that is expected to be present on any isolate of FMDV, this ensures that the VP2-ELISA  
302 is able to detect FMDV antibodies regardless of the viral strain. In contrast to the biological  
303 reagents necessary in many other ELISA, the VP2 capture antigen is a synthetic peptide, greatly  
304 facilitating standardisation, continuity of supply and reproducibility. More importantly, it does  
305 not require the optimisation and re-validation when serum from antigenic distant strains needs  
306 to be tested.

307 Serological testing is a suitable tool for FMD surveillance. Detection of NSP antibodies  
308 currently offers the advantages of a DIVA and cross-serotype test. However, the VP2 ELISA  
309 can be used as a complementary or confirmatory test to the NSP ELISA, which is especially  
310 useful in obtaining FMDV free status after an outbreak. As for the NSP ELISA, the VP2 ELISA  
311 can also be used as (1) a front-line sero-surveillance assay in areas which are normally free  
312 from FMD without vaccination, (2) for areas conducting surveillance to achieve free from  
313 vaccination status, and (3) at the point of import and export to confirm the freedom of animals  
314 from FMDV antibodies. The test may also provide a simple approach for evaluating vaccine  
315 efficacy in experimental and field trials, although additional studies would need to be carried  
316 out to determine the cut-off that correlates to protection.

317 In conclusion, the results suggest that the VP2 ELISA developed for the detection of antibodies  
318 to FMDV has potential applications as a rapid, simple and inexpensive test in the sero-diagnosis  
319 of FMDV and in sero-surveillance programmes. Further validation and standardisation will be  
320 required to confirm the potential benefits of the VP2 ELISA.

321 **Acknowledgments**

322 This work was financially supported by BBSRC research grant BB/L004828/ and Defra project  
323 SE1129. The Pirbright Institute receives strategic support from the Biotechnology and  
324 Biological Sciences Research Council of the United Kingdom (projects BB/E/I/00007035 and  
325 BB/E/I/00007036)

326 **Conflict of interest**

327 The authors declare that there are no conflicts of interest.

328

329

330 **List of tables and figures**

331 **Table 1.** FMDV mAbs showing cross-serotype reactivity and viral protein (VP) specificity

332 **Table 2.** Comparative sensitivities of VP2 ELISA and other existing serological tests

333 **Fig 1. FMDV heterotypic-reactive mAbs recognise the N terminus of VP2. (a)**

334 Overlapping peptides representing the VP2 N-terminal 45 amino acids. The (K)<sub>6</sub> denotes to  
335 addition of 6 lysine residues at the C-terminus of the peptide to increase peptide solubility.

336 **(b)** Peptide ELISA showing cross reactive mAbs recognise peptides equivalent to the N-  
337 terminal 15 (N15), 30 (N30) and 45 (N45) amino acids of FMDV VP2. The N-terminal 45  
338 amino acids of human rhinovirus VP4 (HRV-VP4) was used as negative control; peptides  
339 concentration was 2 µg/ml. **(c)** mAb 4A3 epitope mapping (using peptides shown in panel a)  
340 identifies the cross-reactive epitope at the N-terminus of VP2. **(d)** Reactivity of mAb 4A3  
341 with capsid protein VP2 of all 7 serotypes in western blot. 4A3 mAb produced a clear intense  
342 band for VP2 and a weaker reaction for VP0 **(e)** Immunofluorescence microscopy using mAb  
343 4A3 to detect FMDV serotype O infected IBRS-2 cells.

344 **Fig 2. Sera from animals infected with any serotype of FMDV react with VP2 peptides**

345 **(a)** Reactivity of serum from an animal experimentally infected with FMDV serotype O with  
346 peptides equivalent to the N-terminal 15 (N15), 30 (N30) or 45 (N45) amino acids of FMDV  
347 VP2, or the N-terminal 45 amino acids of human rhinovirus VP4 (HRV-VP4, negative  
348 control). **(b)** Reactivity of sera from animals vaccinated with vaccine strains of the seven  
349 serotypes with the FMDV VP2N-45 peptide.

350 **Fig. 3. Testing reference negative and positive serum samples to detect the specificity**

351 **and sensitivity of the assay. (a)** Reactivity in VP2 ELISA (OD 490nm) of negative (black  
352 squares, n=100) and positive (circles are infected, triangles are vaccinated, serotypes  
353 represented by colours as indicated; n=72) reference sera. Peptide was at 2µg /ml and sera



354 diluted 1 in 100. **(b)** Distribution plots comparing results of positive sera tested with VP2  
355 ELISA (same as data in a; cut-off of 0.4 OD) and with homologous (n=37) and heterologous  
356 (n=72) VNT (cut-off = log titre 1.65).

357 **(c)** Distribution plots comparing results of positive sera tested with VP2 ELISA (same as  
358 data in a; cut-off of 0.4 OD) with homologous (n=30) and heterologous (n=72) LPBE (cut-off  
359 =log titre 1.95). **(d)** Distribution plots comparing results of positive sera tested with VP2  
360 ELISA (same as data in a; cut-off of 0.4 OD), with SPCE (n=30, cut-off =40% of inhibition)  
361 and PrioCHECK kits ELISA (n=29, cut-off =50% of inhibition).

## 362 **Supplementary Figures and tables**

363 **Fig S1. Optimisation of the peptide ELISA using different concentrations of peptide and**  
364 **dilution of the serum of serotype O from infected animal. (a)** Checkerboard ELISA with  
365 negative (0 d) and positive (42 d) sera diluted from 1:10 to 1:80 (as shown in key) and with  
366 peptide concentration in the range 0.125-2µg/ml. The optimal conditions for signal to  
367 background are highlighted with a box (2µg/ml of peptide and 1 in 100 serum dilution). **(b)**  
368 Reactivity with VP2N45 peptide at 2µg/ml of different dilutions of a strong responder serum  
369 sample (type C) and a weak responder serum sample (type SAT3). The asterisk denotes the  
370 best conditions of peptide at 2µg/ml and sera diluted 1:100.

371

372

373

## 374 Reference

- 375 1. Hui RK, Leung FC. Evolutionary trend of foot-and-mouth disease virus in Hong  
376 Kong. *Vet Microbiol.* 2012;159(1-2):221-9.
- 377 2. Knowles NJ, He JJ, Shang YJ, Wadsworth J, Valdazo-Gonzalez B, Onosato H, et al.  
378 Southeast Asian Foot-and-Mouth Disease Viruses in Eastern Asia. *Emerg Infect Dis.*  
379 2012;18(3):499-501.
- 380 3. Hogle JM. Poliovirus cell entry: Common structural themes in viral cell entry  
381 pathways. *Annu Rev Microbiol.* 2002;56:677-702.
- 382 4. Tuthill TJ, Gropelli E, Hogle JM, Rowlands DJ. Picornaviruses. *Curr Top Microbiol.*  
383 2010;343:43-89.
- 384 5. Clavijo A, Wright P, Kitching P. Developments in diagnostic techniques for  
385 differentiating infection from vaccination in foot-and-mouth disease. *Vet J.*  
386 2004;167(1):9-22.
- 387 6. King D., Ludi A., Wilsden G., Parida S. & Paton D. The use of non-structural proteins  
388 to differentiate between vaccinated and infected animals. Middle East- OIE Regional  
389 Commission 2015.  
390 [http://www.oie.int/fileadmin/Home/eng/Publications\\_%26\\_Documentation/docs/pdf/](http://www.oie.int/fileadmin/Home/eng/Publications_%26_Documentation/docs/pdf/TT/2015_MO2_King.pdf)  
391 [TT/2015\\_MO2\\_King.pdf](http://www.oie.int/fileadmin/Home/eng/Publications_%26_Documentation/docs/pdf/TT/2015_MO2_King.pdf)
- 392 7. Brocchi E., Bergmann I.E., Dekker A., Paton D.J., Sammin D.J., Greiner M., Grazioli  
393 S., De Simone F., Yadin H., Haas B., Bulut N., Malirat V., Neitzert E., Goris N.,  
394 Parida S., Sørensen K. & De Clercq K. Comparative evaluation of six ELISAs for the  
395 detection of antibodies to the non-structural proteins of FMDV. *Vaccine.* 2006;24(47-  
396 48): 6966-79.
- 397 8. Paton DJ, de Clercq K, Greiner M, Dekker A, Brocchi E, Bergmann I, Sammin DJ,  
398 Gubbins S, Parida S. Application of non-structural protein antibody tests in  
399 substantiating freedom from foot-and-mouth disease virus infection after emergency  
400 vaccination of cattle. *Vaccine* 2006; 24(42-43):6503-12
- 401 9. Ryan E, Gloster J, Reid SM, Li Y, Ferris NP, Waters R, et al. Clinical and laboratory  
402 investigations of the outbreaks of foot-and-mouth disease in southern England in
- 403 10. Robiolo B, La Torre J, Duffy S, Leon E, Seki C, Torres A, et al. Quantitative single  
404 serum-dilution liquid phase competitive blocking ELISA for the assessment of herd  
405 immunity and expected protection against foot-and-mouth disease virus in vaccinated  
406 cattle. *J Virol Methods.* 2010;166(1-2):21-7.
- 407 11. Biswal JK, Bisht P, Mohapatra JK, Ranjan R, Sanyal A, Pattnaik B. Application of a  
408 recombinant capsid polyprotein (P1) expressed in a prokaryotic system to detect  
409 antibodies against foot-and-mouth disease virus serotype O. *J Virol Methods.*  
410 2015;215-216:45-51.
- 411 12. Hamblin C, Barnett IT, Hedger RS. A new enzyme-linked immunosorbent assay  
412 (ELISA) for the detection of antibodies against foot-and-mouth disease virus. I.  
413 Development and method of ELISA. *J Immunol Methods.* 1986;93(1):115-21.
- 414 13. Paiba GA, Anderson J, Paton DJ, Soldan AW, Alexandersen S, Corteyn M, et al.  
415 Validation of a foot-and-mouth disease antibody screening solid-phase competition  
416 ELISA (SPCE). *J Virol Methods.* 2004;115(2):145-58.
- 417 14. World Organisation for Animal Health. In: Manual of diagnostic tests and vaccines  
418 for terrestrial animals (mammals, birds and bees) Office International des épizooties,  
419 editor. Paris: Office International des épizooties; 2008.

- 420 15. Muller JD, McEachern JA, Bossart KN, Hansson E, Yu M, Clavijo A, et al. Serotype-  
421 independent detection of foot-and-mouth disease virus. *J Virol Methods*.  
422 2008;151(1):146-53.
- 423 16. Yang M, Clavijo A, Suarez-Banmann R, Avalo R. Production and characterization of  
424 two serotype independent monoclonal antibodies against foot-and-mouth disease  
425 virus. *Vet Immunol Immunop*. 2007;115(1-2):126-34.
- 426 17. Freiberg B, Hohlich B, Haas B, Saalmuller A, Pfaff E, Marquardt O. Type-  
427 independent detection of foot-and-mouth disease virus by monoclonal antibodies that  
428 bind to amino-terminal residues of capsid protein VP2. *J Virol Methods*. 2001;92  
429 (2):199-205.
- 430 18. Panjwani A, Asfor AS, Tuthill TJ. The conserved N-terminus of human rhinovirus  
431 capsid protein VP4 contains membrane pore-forming activity and is a target for  
432 neutralizing antibodies. *J Gen Virol*. 2016;97(12):3238-42.
- 433 19. Parida S, Fleming L, Gibson D, Hamblin PA, Grazioli S, Brocchi E, et al. Bovine  
434 serum panel for evaluating foot-and-mouth disease virus nonstructural protein  
435 antibody tests. *J Vet Diagn Invest*. 2007;19(5):539-44.
- 436 20. Brocchi E, Gamba D, Poumarat F, Martel JL, De Simone F. Improvements in the  
437 diagnosis of contagious bovine pleuropneumonia through the use of monoclonal  
438 antibodies. *Rev Sci Tech*. 1993 Jun;12 (2):559-70
- 439 21. Grazioli S, Fallacara F, Brocchi E. Mapping of antigenic sites of Foot-and-Mouth  
440 Disease virus serotype Asia 1 and relationships with sites described in other  
441 serotypes. *J Gen Virol*. 2013 Mar;94(Pt 3):559-69. Epub 2012 Nov 28.
- 442 22. Acharya R, Fry E, Stuart D, Fox G, Rowlands D, Brown F. The three-dimensional  
443 structure of foot-and-mouth disease virus at 2.9 Å resolution. *Nature*.  
444 1989;337(6209):709-16.
- 445 23. Lea S, Hernandez J, Blakemore W, Brocchi E, Curry S, Domingo E, et al. The  
446 structure and antigenicity of a type C foot-and-mouth disease virus. *Structure*.  
447 1994;2(2):123-39.
- 448 24. Curry S, Fry E, Blakemore W, Abu-Ghazaleh R, Jackson T, King A, et al. Dissecting  
449 the roles of VP0 cleavage and RNA packaging in picornavirus capsid stabilization:  
450 the structure of empty capsids of foot-and-mouth disease virus. *J Virol*.  
451 1997;71(12):9743-52.
- 452  
453  
454

455

**Table 1. FMDV-specific mAbs showing cross-serotype reactivity, viral protein (VP) specificity.**

456

| mAb ID | Parent virus       | Trapping ELISA |   |   |       |      |      |      | Western blot |
|--------|--------------------|----------------|---|---|-------|------|------|------|--------------|
|        |                    | O              | A | C | ASIA1 | SAT1 | SAT2 | SAT3 | VP TARGET    |
| 5B2    | A Malaysia 16/97   | +              | + | + | +     | +    | +    | +    | VP2 (+VP0)   |
| 4A3    | C1                 | +              | + | + | +     | +    | +    | +    | VP2 (±VP0)   |
| 5F10   | Asia 1 Nepal 29/97 | +              | + | + | +     | +/-  | +    | +    | VP2 (+VP0)   |
| 4A10   | A24 Cruz           | +              | + | + | +     | +    | +    | +    | P1           |
| 5A4    | A24 Cruz           | +              | + | + | +     | +    | +    | +    | P1           |
| 4D1    | O UK 31/01         | +              | + | + | +     | +    | +    | +    | VP2 (+VP0)   |
| 1D6    | O UK 31/01         | +              | + | + | +     | +    | +    | +    | VP2 (+VP0)   |

**Table 2. Diagnostic sensitivity of the VP2 ELISA compared to other serological tests**

|                                | VP2-ELISA | VNT hetro | VNT homo | LPBE-hetro | LPBE-homo | SPCE-homo | PrioCHECK | Samples status |
|--------------------------------|-----------|-----------|----------|------------|-----------|-----------|-----------|----------------|
| <b>Total number of samples</b> | 72        | 72        | 37       | 72         | 30        | 72        | 29        | Positive       |
| <b>% Sensitivity</b>           | 98.59     | 73.23     | 100      | 92.95      | 100       | 98.59     | 93.1      |                |
| <b>% Specificity</b>           | 93        | ND        | ND       | ND         | ND        | ND        | ND        | Negative       |

### Fig.1 FMDV cross-reactive mAbs recognise the N terminus of VP2

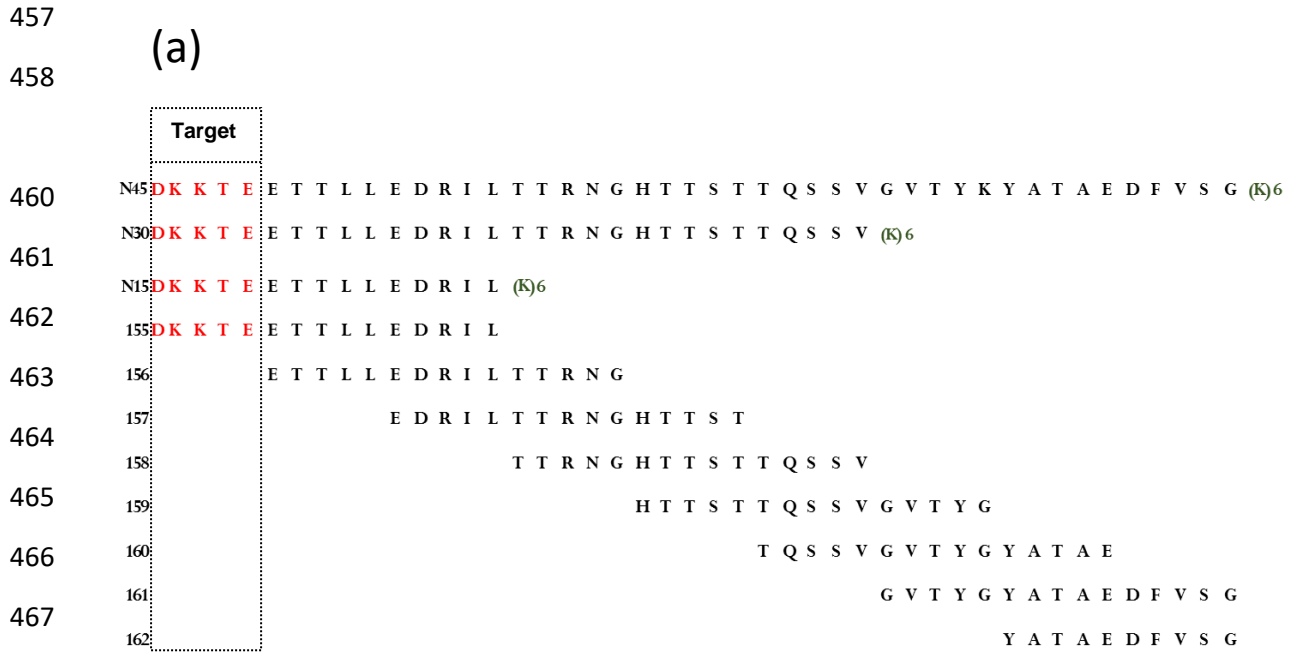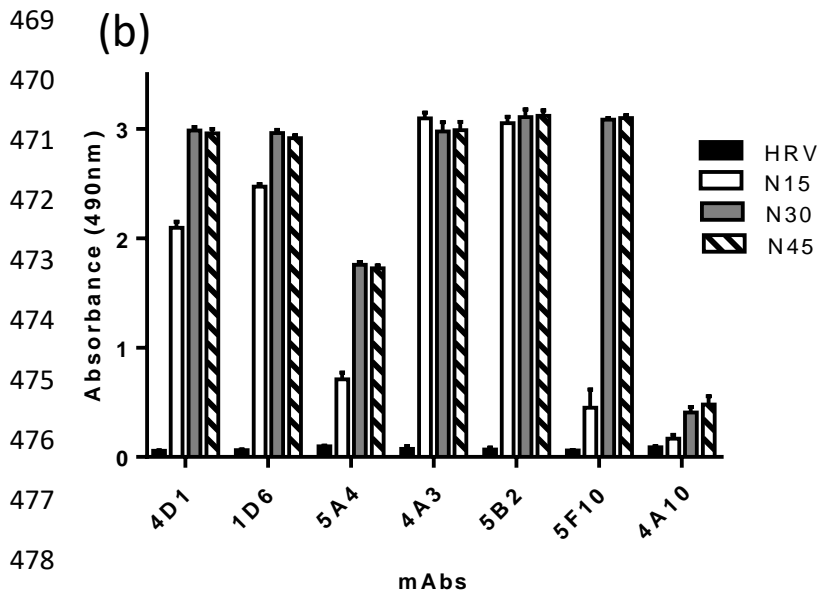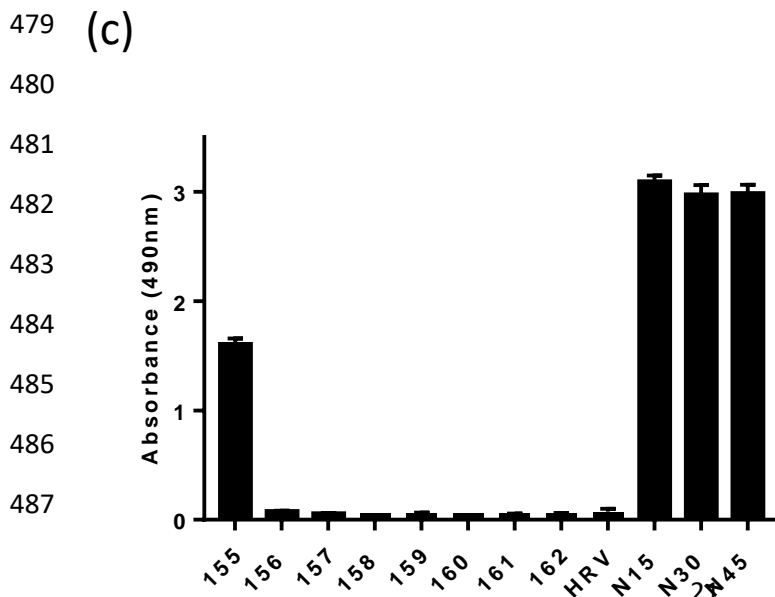

488 **Fig.1 (continue)**

489 (d)

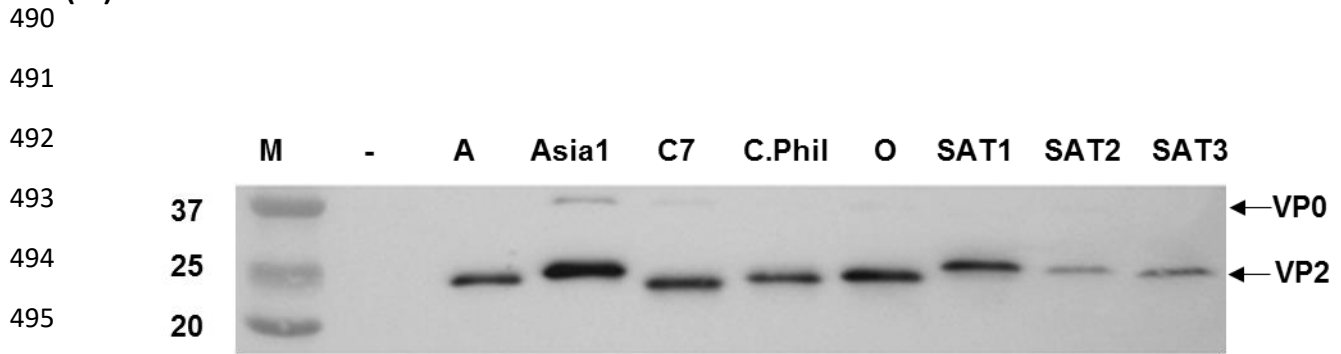

501 (e)

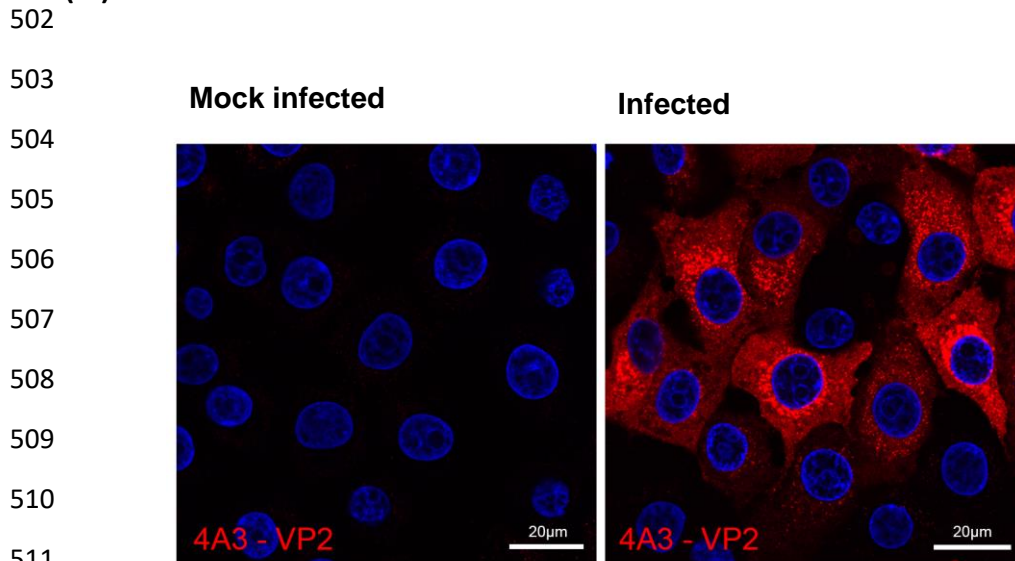

519

520

**Fig. 2. Sera from animals infected with any serotype of FMDV react with VP2 peptides**

521

522

523

524

525

526

**(a)**

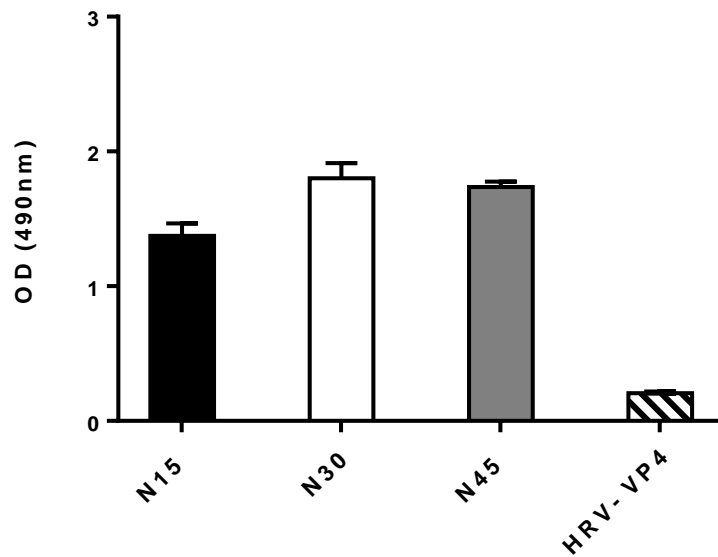

**(b)**

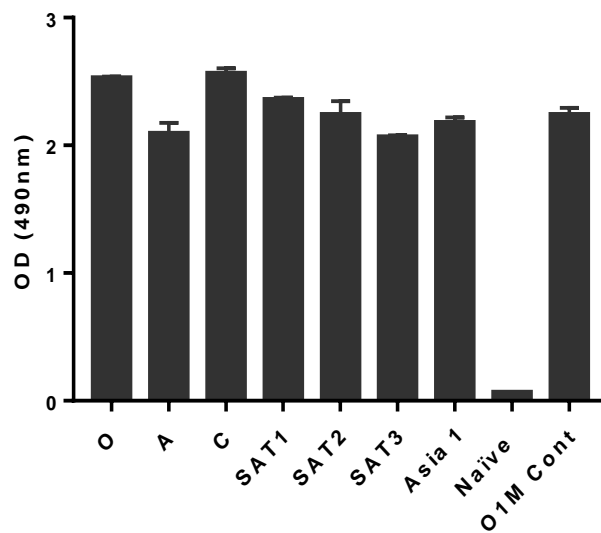

527

528

### Fig.3. Testing reference negative and positive serum samples to define the diagnostic specificity and sensitivity of the VP2 ELISA

529

530

531

532

533

534

535

536

537

538

539

540

541

542

543

544

545

546

547

548

549

550

551

552

553

554

555

556

(a)

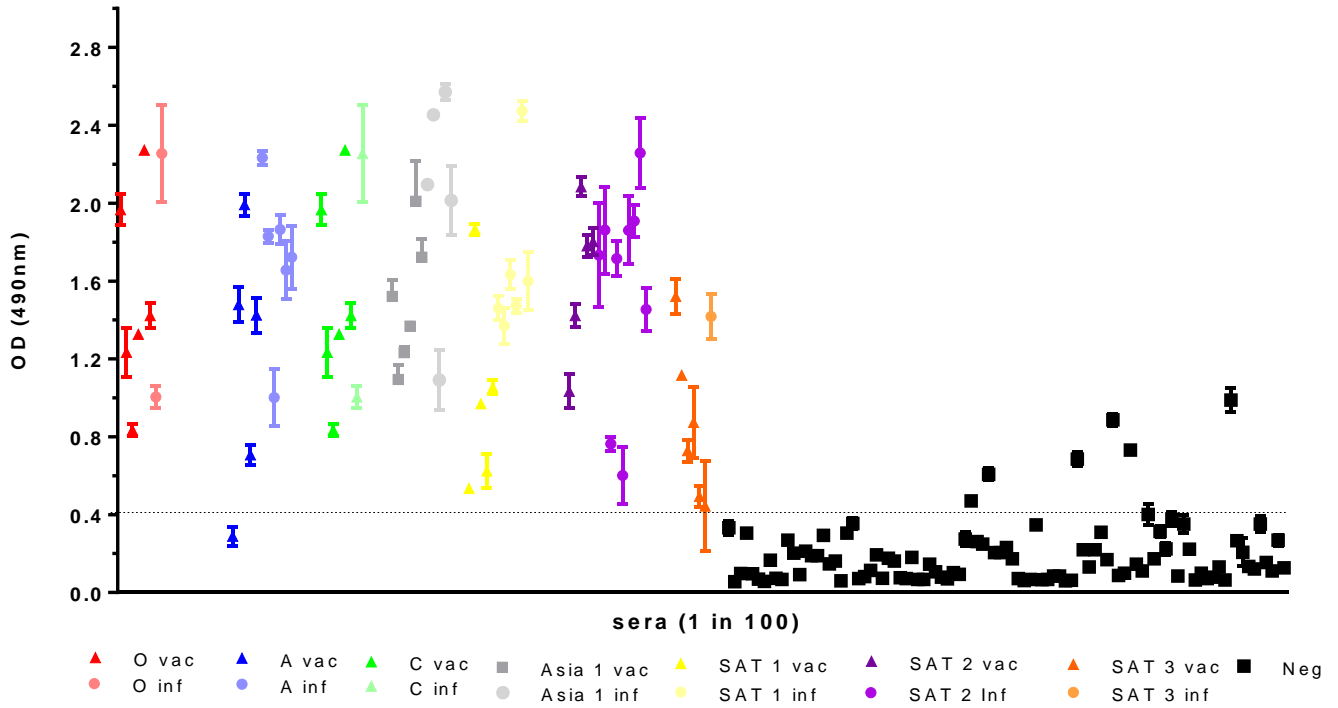

(b)

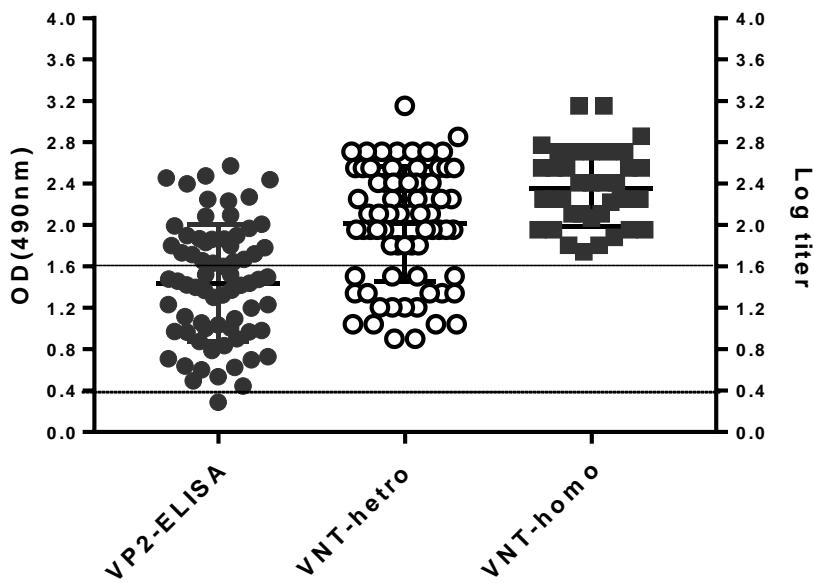



557

558

(c)

559

560

561

562

563

564

565

566

567

568

569

570

571

(d)

573

574

575

576

577

578

579

580

581

582

583

584

585

586

587

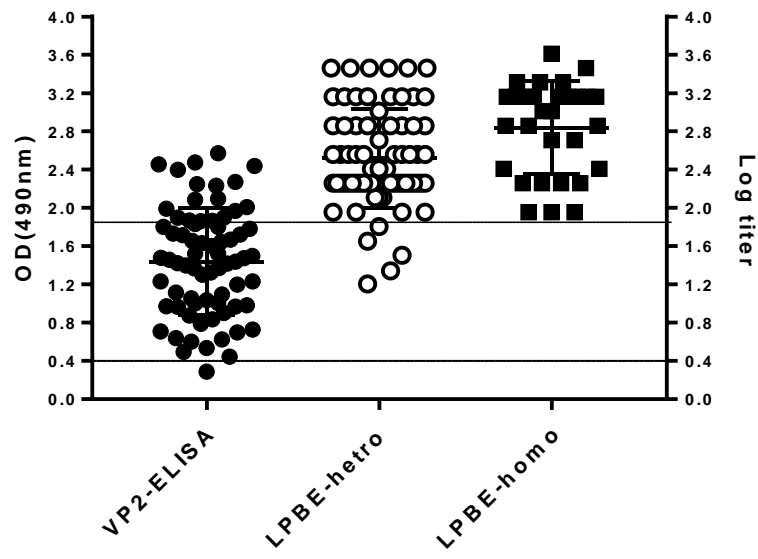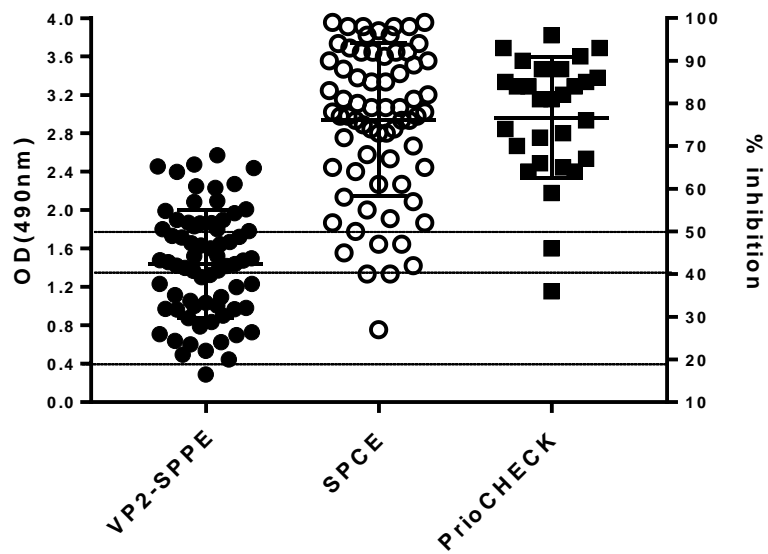

588 **Supplementary figures and tables**

589 **Fig.S1. Optimisation of the peptide ELISA using different concentrations of**  
 590 **peptides and dilutions of the serum**

591

592

593

594

595

596

597

598

599

600

601

602

603

604

605

606

607

608

609

610

611

612

613

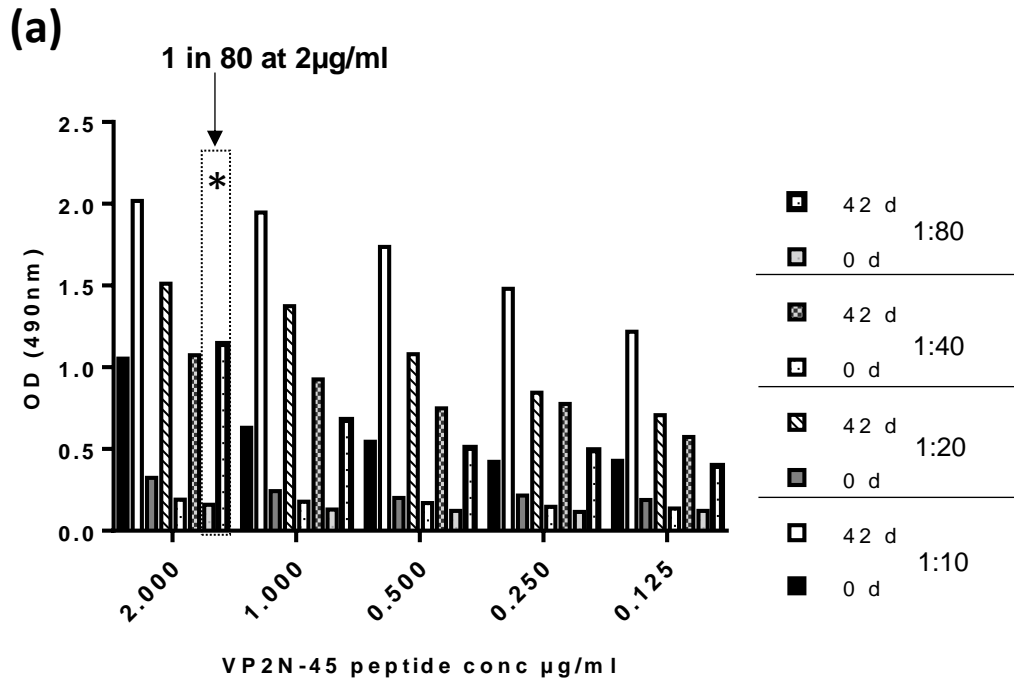

(b)

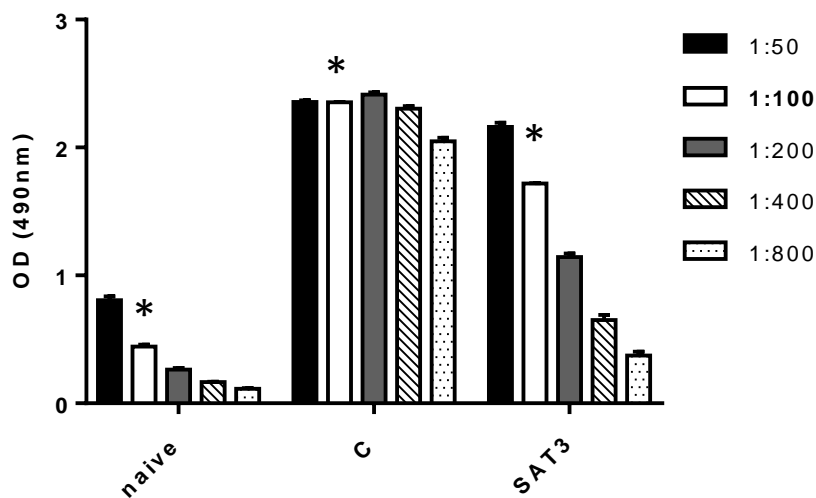

Source: http://biorxiv.org/content/10.1101/797332v1.full.pdf
